# Supplementary material for: Induction of Potent Neutralizing Antibody Responses by a Designed Protein Nanoparticle Vaccine for Respiratory Syncytial Virus
Source: PubMed Central journal article supplement (PMC6424820; doi:10.1016/j.cell.2019.01.046), 2019-03-07
Supplement: mmc1.pdf [file mmc1.pdf]

**Cell, Volume 177**

## **Supplemental Information**

### **Induction of Potent Neutralizing Antibody**

### **Responses by a Designed Protein Nanoparticle**

### **Vaccine for Respiratory Syncytial Virus**

**Jessica Marcandalli, Brooke Fiala, Sebastian Ols, Michela Perotti, Willem de van der Schueren, Joost Snijder, Edgar Hodge, Mark Benhaim, Rashmi Ravichandran, Lauren Carter, Will Sheffler, Livia Brunner, Maria Lawrenz, Patrice Dubois, Antonio Lanzavecchia, Federica Sallusto, Kelly K. Lee, David Veessler, Colin E. Correnti, Lance J. Stewart, David Baker, Karin Loré, Laurent Perez, and Neil P. King**

**Table S1. Amino acid sequences of proteins used in this work, related to Figures 1-7**

>DS-Cav1 +foldon

MELLILKANAITTILTAVTFCFASGQNITEEFYQSTCSAVSKGYLSALRTGWYTSVITIELSNIKENKCNNGTDAKVKLIKQELD  
KYKNAVTELQLLMQSTPATNNRARRRELPRFMNYTLNNAKKTNTVLSKKRKRFLGFLGVSAGIASGVAVCKVLHLEGE  
VNKIKSALLSTNKAVVLSNGVSVLTFKVLDLKNYIDKQLLPILNKQSCSISNIETVIEFQQKNNRLEITREFSVNAGVTTPV  
STYMLTNSELLSLINDMPITNDQKKLMSNNVQIVRQQSYSIMCIIKEEVLAYVVQLPLYGVIDTPCWKLHTSPLCTTNTKE  
GSNICLTRDRGWYCDNAGSVSFFPQAETCKVQSNRVFCDTMNSLTLPSEVNLCNVDIFNPKYDCKIMTSKTDVSSSVI  
TSLGAIVSCYGKTKCTASNKNRGIKFTSNGCDYVSNKGVDTVSVGNTLYYVVKQEGKSLYVKGEPIINFYDPLVFPDEF  
DASISQVNEKINQSLAFIRKSDELLSAIGGYIPEAPRDGQAYVRKDGWVLLSTFLENLYFQSSAWSHPPQFEKGGGSGGG  
SGGSAWSPQFEKGGSGSGSGLNDIFEAQKIEWHEGSGSGSHHHHHHHH

>Postfusion RSV F -foldon

MELLILKANAITTILTAVTFCFASGQNITEEFYQSTCSAVSKGYLSALRTGWYTSVITIELSNIKKNCNGTDAKIKLIKQELD  
KYKNAVTELQLLMQSTPATNNRARRRELPRFMNYTLNNAKKTNTVLSKKRKRFLGFLGVSAGIASGVAVSKVLHLEGE  
VNKIKSALLSTNKAVVLSNGVSVLTSKVLDLKNYIDKQLLPVINKQSCSISNIETVIEFQQKNNRLEITREFSVNAGVTTP  
VSTYMLTNSELLSLINDMPITNDQKKLMSNNVQIVRQQSYSIMSIIKEEVLAYVVQLPLYGVIDTPCWKLHTSPLCTTNTK  
EGSNICLTRDRGWYCDNAGSVSFFPQAETCKVQSNRVFCDTMNSLTLPSEVNLCNVDIFNPKYDCKIMTSKTDVSSSV  
ITSLGAIVSCYGKTKCTASNKNRGIKFTSNGCDYVSNKGVDTVSVGNTLYYVVKQEGKSLYVKGEPIINFYDPLVFPDEF  
DASISQVNEKINQSLAFIRKSDELLHNVNAVENLYFQSSAWSHPPQFEKGGGSGGGSGGSAWSPQFEKGGSGSGSGLN  
DIFEAQKIEWHEGSGSGSHHHHHHHH

>DS-Cav1-153-50A +foldon (“DS-Cav1-153-50A”)

MELLILKANAITTILTAVTFCFASGQNITEEFYQSTCSAVSKGYLSALRTGWYTSVITIELSNIKENKCNNGTDAKVKLIKQELD  
KYKNAVTELQLLMQSTPATNNRARRRELPRFMNYTLNNAKKTNTVLSKKRKRFLGFLGVSAGIASGVAVCKVLHLEGE  
VNKIKSALLSTNKAVVLSNGVSVLTFKVLDLKNYIDKQLLPILNKQSCSISNIETVIEFQQKNNRLEITREFSVNAGVTTPV  
STYMLTNSELLSLINDMPITNDQKKLMSNNVQIVRQQSYSIMCIIKEEVLAYVVQLPLYGVIDTPCWKLHTSPLCTTNTKE  
GSNICLTRDRGWYCDNAGSVSFFPQAETCKVQSNRVFCDTMNSLTLPSEVNLCNVDIFNPKYDCKIMTSKTDVSSSVI  
TSLGAIVSCYGKTKCTASNKNRGIKFTSNGCDYVSNKGVDTVSVGNTLYYVVKQEGKSLYVKGEPIINFYDPLVFPDEF  
DASISQVNEKINQSLAFIRGYIPEAPRDGQAYVRKDGWVLLSTFLGSGSHHHHHHHHGSGSGGSEKAAKAEAAARK  
MEELFKKKHIVAVLRANSVEEAIEKAVAVFAGGVHLIEITFTVPDADTVIKALSVLKEKGAIIAGAGTVTSVEQCRKAVESGA  
EFIVSPHLDEEISQFCKEKGVFYMPGVMTPTTELVKAMKLGHTILKLFPGEVVGPQFVKAMKGPFPNVKFPVPTGGVNL  
NVCEWFKAGVLA VGVSALVKGTPDEVREKAKAFVEKIRGCTE

>153-50A

MKMEELFKKKHIVAVLRANSVEEAIEKAVAVFAGGVHLIEITFTVPDADTVIKALSVLKEKGAIIAGAGTVTSVEQCRKAVE  
SGAEFIVSPHLDEEISQFCKEKGVFYMPGVMTPTTELVKAMKLGHTILKLFPGEVVGPQFVKAMKGPFPNVKFPVPTGGV  
NLDNVCEWFKAGVLA VGVSALVKGTPDEVREKAKAFVEKIRGCTELEHHHHHHH

>153-50B.4PT1

MNQHSHKDHETVRIAVVRARWHAEIVDACVSAFEAAMRDIGGDRFAVDVDFVPGAYEIPHARTLAETGRYGAVLGT  
AFVVNGGIYRHEFVASAVINGMMNVQLNTGVPVLSAVLTPHNYDKSKAHTLLFLALFAVKGMEAAARACVEILAAREKI  
AAGSLEHHHHHHH

>2obx-wt

MNQHSHKDYETVRIAVVRARWHADIVDQCVSFAEEMADIGGDRFAVDVFDVPGAYEIPHLHARTLAETGRYGAVLGT  
AFVVNGGIYRHEFVASAVIDGMMNVQLSTGVPVLSAVLTPHNYHDSAETHRFFFEHFTVKGKEAARACVEILAAREKIA  
AGSLEHHHHHH

>DS-Cav1-I53-50A -foldon

MELLILKANAITTILTAVTFCFASGQNITEEFYQSTCSAVSKGYLSALRTGWYTSVITIELSNIKENKCNGTDAKVLIKQELD  
KYKNAVTELQLLMQSTPATNNRARRRELPRFMNYTLNNAKKTNTVLSKKRKRFLGFLLGVGSAIASGVAVCKVLHLEGE  
VNIKISALLSTNKAVVLSNGVSVLTFKVLDLKKNYIDKQLLPILNKQSCSISNIETVIEFQQKNNRLEITREFSVNAGVTPV  
STYMLTNSSELLSLINDMPITNDQKKLMSNNVQIVRQQSYSIMCIIKEVLAYVVQLPLYGVIDTPCWKLHTSPLCTTNTKE  
GSNICLRTDRGWYCDNAGSVSFFPQAETCKVQSNRVFCDTMNSLTPSEVNLCNVDIFNPKYDCKIMTSKTDVSSSVI  
TSLGAIVSCYGKTKCTASNKNRGIKTSNGCDYVSNGKGVDTVSVGNTLYYVKNQEGKSLYVKGEPIINFYDPLVFPDEF  
DASISQVNEKINQSLAFIRGGSGSGSEKAAKAEEAARKMEELFKKHKIVAVLRANSVEEAIEKAVAVFAGGVHLIEITFT  
VPDADTVIKALSVLKEKGAIAGTVTSVEQCRKAVESGAEFIVSPHLDEEISQFCKEKGVFYMPGVMPTTELVKAMKLG  
HTILKLFPGEVVGPQFVKAMKGPFPNVKFPVPTGGVNLNDNVCEWFKAGVLAVGVGSALVKGTPDEVREKAKAFVEKIRG  
CTEGSHHHHHH

>DS-Cav1-I3-01 +foldon

MELLILKANAITTILTAVTFCFASGQNITEEFYQSTCSAVSKGYLSALRTGWYTSVITIELSNIKENKCNGTDAKVLIKQELD  
KYKNAVTELQLLMQSTPATNNRARRRELPRFMNYTLNNAKKTNTVLSKKRKRFLGFLLGVGSAIASGVAVCKVLHLEGE  
VNIKISALLSTNKAVVLSNGVSVLTFKVLDLKKNYIDKQLLPILNKQSCSISNIETVIEFQQKNNRLEITREFSVNAGVTPV  
STYMLTNSSELLSLINDMPITNDQKKLMSNNVQIVRQQSYSIMCIIKEVLAYVVQLPLYGVIDTPCWKLHTSPLCTTNTKE  
GSNICLRTDRGWYCDNAGSVSFFPQAETCKVQSNRVFCDTMNSLTPSEVNLCNVDIFNPKYDCKIMTSKTDVSSSVI  
TSLGAIVSCYGKTKCTASNKNRGIKTSNGCDYVSNGKGVDTVSVGNTLYYVKNQEGKSLYVKGEPIINFYDPLVFPDEF  
DASISQVNEKINQSLAFIRGYIPEAPRDGQAYVRKDGWVLLSTFLGGSGSGSEKAAKAEEAARKMEELFKKHKIVAVL  
RANSVEEAKKALAVFLGGVHLIEITFTVPDADTVIKELSFLKEMGAIAGTVTSVEQCRKAVESGAEFIVSPHLDEEISQF  
CKEKGVFYMPGVMPTTELVKAMKLGHTILKLFPGEVVGPQFVKAMKGPFPNVKFPVPTGGVNLNDNVCEWFKAGVLAV  
GVGSALVKGTPVEVAEKAKAFVEKIRGCTEGSENLYFQSGHHHHHHGSGSGWSHPQFEKSGSWSHPQFEKSR

>DS-Cav1-I3-01 -foldon

MELLILKANAITTILTAVTFCFASGQNITEEFYQSTCSAVSKGYLSALRTGWYTSVITIELSNIKENKCNGTDAKVLIKQELD  
KYKNAVTELQLLMQSTPATNNRARRRELPRFMNYTLNNAKKTNTVLSKKRKRFLGFLLGVGSAIASGVAVCKVLHLEGE  
VNIKISALLSTNKAVVLSNGVSVLTFKVLDLKKNYIDKQLLPILNKQSCSISNIETVIEFQQKNNRLEITREFSVNAGVTPV  
STYMLTNSSELLSLINDMPITNDQKKLMSNNVQIVRQQSYSIMCIIKEVLAYVVQLPLYGVIDTPCWKLHTSPLCTTNTKE  
GSNICLRTDRGWYCDNAGSVSFFPQAETCKVQSNRVFCDTMNSLTPSEVNLCNVDIFNPKYDCKIMTSKTDVSSSVI  
TSLGAIVSCYGKTKCTASNKNRGIKTSNGCDYVSNGKGVDTVSVGNTLYYVKNQEGKSLYVKGEPIINFYDPLVFPDEF  
DASISQVNEKINQSLAFIRGGSGSGSEKAAKAEEAARKMEELFKKHKIVAVLRANSVEEAKKALAVFLGGVHLIEITFT  
VPDADTVIKELSFLKEMGAIAGTVTSVEQCRKAVESGAEFIVSPHLDEEISQFCKEKGVFYMPGVMPTTELVKAMKLG  
HTILKLFPGEVVGPQFVKAMKGPFPNVKFPVPTGGVNLNDNVCEWFKAGVLAVGVGSALVKGTPVEVAEKAKAFVEKIRG  
CTEGSENLYFQSGHHHHHHGSGSGWSHPQFEKSGSWSHPQFEKSR

>DS-Cav1-T33-15B +foldon

MELLILKANAITTILTAVTFCFASGQNITEEFYQSTCSAVSKGYLSALRTGWYTSVITIELSNIKENKCNGTDAKVLIKQELD  
KYKNAVTELQLLMQSTPATNNRARRRELPRFMNYTLNNAKKTNTVLSKKRKRFLGFLLGVGSAIASGVAVCKVLHLEGE

VNKIKSALLSTNKAVVSLNNGVSVLTFKVLDLKNYIDKQLLPILNKQSCSISNIETVIEFQQKNNRLEITREFSVNAGVTPPV  
STYMLTNSSELLSLINDMPITNDQKKLMSNNVQIVRQQSYSIMCIIKEVLAYVVQLPLYGVIDTPCWKLHTSPLCTTNTKE  
GSNICLRTDRGWYCDNAGSVSFFPQAETCKVQSNRVFCDTMNSLTPSEVNLCNVDIFNPKYDCKIMTSKTDVSSSVI  
TSLGAIVSCYGKTKCTASNKNRGIKFTSNGCDYVSNGKGVDTVSVGNTLYYVVKQEGKSLYVKGEPIINFYDPLVFPDDEF  
DASISQVNEKINQSLAFIRKSDELLGYIPEAPRDGQAYVRKDGWVLLSTFLGGSMVRGIRGAITVNSDTPTSIIIATILLE  
KMLEANGIQSYEELAAVIFTVTEDLTSAFPAEAARQIGMHRVPLLSAREVPVPGSLPRVIRVLALWNTDTPQDRVRHVYL  
SEAVRLRPDLESAQGSHHHHHH

>DS-Cav1-T33-15B -foldon

MELLILKANAITTILTAFTFCFASGQNITEEFYQSTCSAVSKGYLSALRTGWYTSVITIELSNIKENKCNNGTDAKVLIKQELD  
KYKNAVTELQLLMQSTPATNNRARELPRFMNYTLNNAKKTNTVLSKKRKRFLGFLGVSAGIASGVAVCKVLHLEGE  
VNKIKSALLSTNKAVVSLNNGVSVLTFKVLDLKNYIDKQLLPILNKQSCSISNIETVIEFQQKNNRLEITREFSVNAGVTPPV  
STYMLTNSSELLSLINDMPITNDQKKLMSNNVQIVRQQSYSIMCIIKEVLAYVVQLPLYGVIDTPCWKLHTSPLCTTNTKE  
GSNICLRTDRGWYCDNAGSVSFFPQAETCKVQSNRVFCDTMNSLTPSEVNLCNVDIFNPKYDCKIMTSKTDVSSSVI  
TSLGAIVSCYGKTKCTASNKNRGIKFTSNGCDYVSNGKGVDTVSVGNTLYYVVKQEGKSLYVKGEPIINFYDPLVFPDDEF  
DASISQVNEKINQSLAFIRKSDELLGGSMVRGIRGAITVNSDTPTSIIIATILLEKMLEANGIQSYEELAAVIFTVTEDLTSAF  
PAEAARQIGMHRVPLLSAREVPVPGSLPRVIRVLALWNTDTPQDRVRHVYLSEAVRLRPDLESAQGSHHHHHH

>DS-Cav1-T33-31A +foldon

MELLILKANAITTILTAFTFCFASGQNITEEFYQSTCSAVSKGYLSALRTGWYTSVITIELSNIKENKCNNGTDAKVLIKQELD  
KYKNAVTELQLLMQSTPATNNRARELPRFMNYTLNNAKKTNTVLSKKRKRFLGFLGVSAGIASGVAVCKVLHLEGE  
VNKIKSALLSTNKAVVSLNNGVSVLTFKVLDLKNYIDKQLLPILNKQSCSISNIETVIEFQQKNNRLEITREFSVNAGVTPPV  
STYMLTNSSELLSLINDMPITNDQKKLMSNNVQIVRQQSYSIMCIIKEVLAYVVQLPLYGVIDTPCWKLHTSPLCTTNTKE  
GSNICLRTDRGWYCDNAGSVSFFPQAETCKVQSNRVFCDTMNSLTPSEVNLCNVDIFNPKYDCKIMTSKTDVSSSVI  
TSLGAIVSCYGKTKCTASNKNRGIKFTSNGCDYVSNGKGVDTVSVGNTLYYVVKQEGKSLYVKGEPIINFYDPLVFPDDEF  
DASISQVNEKINQSLAFIRGYIPEAPRDGQAYVRKDGWVLLSTFLGSGSMEEVVLITVPSALVAVKIAHALVEERLAACV  
NIVPGLTSIYREEGSVSDHELLLVKTTTDAFPKPKERVKELHPYEVPEIVALPIAEGNREYLDWLRENTENLYFQGQKLIS  
EEDLHHHHHH

>DS-Cav1-T33-31A -foldon

MELLILKANAITTILTAFTFCFASGQNITEEFYQSTCSAVSKGYLSALRTGWYTSVITIELSNIKENKCNNGTDAKVLIKQELD  
KYKNAVTELQLLMQSTPATNNRARELPRFMNYTLNNAKKTNTVLSKKRKRFLGFLGVSAGIASGVAVCKVLHLEGE  
VNKIKSALLSTNKAVVSLNNGVSVLTFKVLDLKNYIDKQLLPILNKQSCSISNIETVIEFQQKNNRLEITREFSVNAGVTPPV  
STYMLTNSSELLSLINDMPITNDQKKLMSNNVQIVRQQSYSIMCIIKEVLAYVVQLPLYGVIDTPCWKLHTSPLCTTNTKE  
GSNICLRTDRGWYCDNAGSVSFFPQAETCKVQSNRVFCDTMNSLTPSEVNLCNVDIFNPKYDCKIMTSKTDVSSSVI  
TSLGAIVSCYGKTKCTASNKNRGIKFTSNGCDYVSNGKGVDTVSVGNTLYYVVKQEGKSLYVKGEPIINFYDPLVFPDDEF  
DASISQVNEKINQSLAFIRGSGSMEEVVLITVPSALVAVKIAHALVEERLAACVNIVPGLTSIYREEGSVSDHELLLVKTT  
TDAFPKPKERVKELHPYEVPEIVALPIAEGNREYLDWLRENTENLYFQGQKLISEEDLHHHHHH

>DS-Cav1-8GS-I32-28A

MELLILKANAITTILTAFTFCFASGQNITEEFYQSTCSAVSKGYLSALRTGWYTSVITIELSNIKENKCNNGTDAKVLIKQELD  
KYKNAVTELQLLMQSTPATNNRARELPRFMNYTLNNAKKTNTVLSKKRKRFLGFLGVSAGIASGVAVCKVLHLEGE  
VNKIKSALLSTNKAVVSLNNGVSVLTFKVLDLKNYIDKQLLPILNKQSCSISNIETVIEFQQKNNRLEITREFSVNAGVTPPV  
STYMLTNSSELLSLINDMPITNDQKKLMSNNVQIVRQQSYSIMCIIKEVLAYVVQLPLYGVIDTPCWKLHTSPLCTTNTKE

GSNICLTRDRGWYCDNAGSVSFFPQAETCKVQSNRVFCDTMNSLTPSEVNLCNVDIFNPKYDCKIMTSKTDVSSSVI  
TSLGAIVSCYGKTKCTASNKNRGIKTFNSGCDYVSNKGVDTVSVGNLTYVVKQEGKSLYVKGEPHIFDYDPLVFPDEF  
DASISQVNEKINQSLAFIRKSDELLGGSGGSGSGSDDARIAAIGDVDELNSQIGVLLAEPLDDVRAALSAIQHDLFDLGG  
LCIPGHAATEDHLLRLALWLVHYNGQLPPEEFILPGGARGAALAHVCRTVCRAERSIKALGASEPLNIAPAAAYVLLS  
DLLFVLARVLNRAAGGADVLWDRTRAHGSHHHHH

>DS-Cav1-12GS-I32-28A

MELLILKANAITTILTAVTFCFASGQNITEEFYQSTCSAVSKGYLSALRTGWYTSVITIELSNIKENKCNNGTDAKVKLIKQELD  
KYKNAVTELQLLMQSTPATNNRARRRELPRFMNYTLNNAKKTNVTLSSKRRRFLGFLLGVGSAIASGVAVCKVLHLEGE  
VNKIKSALLSTNKAVVSLNNGVSVLTFKVLDLKNYIDKQLLPILNKQSCSISNIETVIEFQQKNNRLEITREFSVNAGVTPV  
STYMLTNSSELLSLINDMPITNDQKKLMSNNVQIVRQQSYSIMCIIKEEVLAYVVQLPLYGVIDTPCWKLHTSPLCTTNTKE  
GSNICLTRDRGWYCDNAGSVSFFPQAETCKVQSNRVFCDTMNSLTPSEVNLCNVDIFNPKYDCKIMTSKTDVSSSVI  
TSLGAIVSCYGKTKCTASNKNRGIKTFNSGCDYVSNKGVDTVSVGNLTYVVKQEGKSLYVKGEPHIFDYDPLVFPDEF  
DASISQVNEKINQSLAFIRKSDELLGGSGGSGSGSDDARIAAIGDVDELNSQIGVLLAEPLDDVRAALSAIQHDLFDL  
GGELCIPGHAATEDHLLRLALWLVHYNGQLPPEEFILPGGARGAALAHVCRTVCRAERSIKALGASEPLNIAPAAAYV  
LLSDLLFVLARVLNRAAGGADVLWDRTRAHGSHHHHH
