# Supplementary material for: Induction of Potent Neutralizing Antibody Responses by a Designed Protein Nanoparticle Vaccine for Respiratory Syncytial Virus
Source: PubMed Central journal article supplement (PMC6424820; doi:10.1016/j.cell.2019.01.046), 2019-03-07
Supplement: mmc2.pdf [file mmc2.pdf]

**Supplementary Table 2.  $K_D$  and  $k_{on}$  values calculated from the SPR data presented in Figure S2C, Related to Figure 1**

| mAb  | $K_D$ (M)             |                       | $k_{on}$ ( $M^{-1} s^{-1}$ ) |                   |                    |                    |                     |
|------|-----------------------|-----------------------|------------------------------|-------------------|--------------------|--------------------|---------------------|
|      | DS-Cav1               | DS-Cav1-I53-50A       | DS-Cav1                      | DS-Cav1-I53-50A   | 33% DS-Cav1-I53-50 | 67% DS-Cav1-I53-50 | 100% DS-Cav1-I53-50 |
| D25  | $3.1 \times 10^{-10}$ | $4.7 \times 10^{-10}$ | $4.5 \times 10^5$            | $3.7 \times 10^5$ | $1.4 \times 10^5$  | $2.0 \times 10^5$  | $1.7 \times 10^5$   |
| MPE8 | $1.1 \times 10^{-10}$ | $2.0 \times 10^{-10}$ | $4.2 \times 10^5$            | $4.4 \times 10^5$ | $2.0 \times 10^5$  | $3.9 \times 10^5$  | $3.9 \times 10^5$   |
| AM14 | $7.8 \times 10^{-11}$ | $1.8 \times 10^{-10}$ | $5.5 \times 10^5$            | $3.6 \times 10^5$ | $4.0 \times 10^5$  | $4.1 \times 10^5$  | $5.9 \times 10^5$   |
